# Supplementary material for: Appraising the infection prevention and control practices at two referral hospitals in Malawi: a mixed methods situational analysis
Source: Research Square preprint supplement (doi:10.21203/rs.3.rs-7765572/v1), 2025-10-08
Supplement: Supplementary file [file 067615f0d143ad40fa56a0e5.pdf]

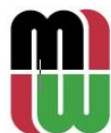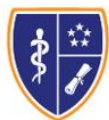

| IV cannula insertion                                             |                                                                                                                                                          |           |           |           |           |           |
|------------------------------------------------------------------|----------------------------------------------------------------------------------------------------------------------------------------------------------|-----------|-----------|-----------|-----------|-----------|
| Observed criteria                                                | <ul style="list-style-type: none"> <li><b>Verification</b></li> </ul>                                                                                    | Patient 1 | Patient 2 | Patient 3 | Patient 4 | Patient 5 |
| Preparation                                                      | <ul style="list-style-type: none"> <li>Explains the procedure to the patient</li> </ul>                                                                  |           |           |           |           |           |
|                                                                  | <ul style="list-style-type: none"> <li>Prepares necessary equipment and supplies</li> </ul>                                                              |           |           |           |           |           |
| Hand hygiene before insertion                                    | <ul style="list-style-type: none"> <li>Hand hygiene is performed correctly</li> <li>Hand wash</li> <li>Alcohol based hand rub</li> </ul>                 |           |           |           |           |           |
| Pre- insertion tasks are performed properly to prevent infection | <ul style="list-style-type: none"> <li>Checks the IV solution (bottle or plastic bag) to be sure it is correct</li> </ul>                                |           |           |           |           |           |
|                                                                  | <ul style="list-style-type: none"> <li>Uses “non-touch” technique to open infusion set</li> </ul>                                                        |           |           |           |           |           |
|                                                                  | <ul style="list-style-type: none"> <li>Inserts infusion set into solution bottle or bag without touching the opening and the spike</li> </ul>            |           |           |           |           |           |
|                                                                  | <ul style="list-style-type: none"> <li>Fills the infusion chamber and tubing</li> </ul>                                                                  |           |           |           |           |           |
|                                                                  | <ul style="list-style-type: none"> <li>Positions the arm with support</li> </ul>                                                                         |           |           |           |           |           |
|                                                                  | <ul style="list-style-type: none"> <li>Applies tourniquet above</li> </ul>                                                                               |           |           |           |           |           |
| The provider performs antisepsis before inserting the IV line.   | <ul style="list-style-type: none"> <li>Puts on clean disposable gloves</li> </ul>                                                                        |           |           |           |           |           |
|                                                                  | <ul style="list-style-type: none"> <li>Using a fresh cotton swab, cleans the site with antiseptic in a circular motion starting at the centre</li> </ul> |           |           |           |           |           |
|                                                                  | <ul style="list-style-type: none"> <li>Allows antiseptic to dry</li> </ul>                                                                               |           |           |           |           |           |
|                                                                  | <ul style="list-style-type: none"> <li>Maintains sterility at the insertion site after antiseptic is applied</li> </ul>                                  |           |           |           |           |           |
| Insertion                                                        | <ul style="list-style-type: none"> <li>Inserts needle with the bevel up into vein without touching other surfaces.</li> </ul>                            |           |           |           |           |           |
|                                                                  | <ul style="list-style-type: none"> <li>Looks for blood return in the tubing and carefully advance the needle</li> </ul>                                  |           |           |           |           |           |



|                                                                                    |                                                                                                                                                                 |  |  |  |  |  |
|------------------------------------------------------------------------------------|-----------------------------------------------------------------------------------------------------------------------------------------------------------------|--|--|--|--|--|
|                                                                                    | <ul style="list-style-type: none"> <li>Releases the tourniquet</li> </ul>                                                                                       |  |  |  |  |  |
|                                                                                    | <ul style="list-style-type: none"> <li>Secures cannula with adhesive tape/ transparent dressing.</li> </ul>                                                     |  |  |  |  |  |
|                                                                                    | <ul style="list-style-type: none"> <li>Labels (date, time, initial) the IV insertion site (on the plaster), bottle or bag with the type of additives</li> </ul> |  |  |  |  |  |
| Healthcare waste management                                                        | <ul style="list-style-type: none"> <li>Disposes of healthcare colour coded/labelled waste in a correct container</li> </ul>                                     |  |  |  |  |  |
| IPC practices are implemented to reduce the risk of infection related to IV lines. | <ul style="list-style-type: none"> <li>Labelling (date, time, initial)</li> </ul>                                                                               |  |  |  |  |  |
|                                                                                    | <ul style="list-style-type: none"> <li>Condition (infiltration, swelling, redness, pus)</li> </ul>                                                              |  |  |  |  |  |
|                                                                                    | <ul style="list-style-type: none"> <li>Dressing is dry, clean, and not tight</li> </ul>                                                                         |  |  |  |  |  |
|                                                                                    | <ul style="list-style-type: none"> <li>The infusion site is changed every 72–96 hours</li> </ul>                                                                |  |  |  |  |  |

| Urinary catheterization                                           |                                                                                                                                                                                              |           |           |           |           |           |
|-------------------------------------------------------------------|----------------------------------------------------------------------------------------------------------------------------------------------------------------------------------------------|-----------|-----------|-----------|-----------|-----------|
| Observed criteria                                                 | Verification                                                                                                                                                                                 | Patient 1 | Patient 2 | Patient 3 | Patient 4 | Patient 5 |
| Preparation                                                       | <ul style="list-style-type: none"> <li>Explains the procedure to the patient</li> </ul>                                                                                                      |           |           |           |           |           |
|                                                                   | <ul style="list-style-type: none"> <li>Prepares necessary sterile and clean equipment and supplies</li> </ul>                                                                                |           |           |           |           |           |
|                                                                   | <ul style="list-style-type: none"> <li>Positions the patient</li> </ul>                                                                                                                      |           |           |           |           |           |
| Hand hygiene before catheterization                               | <ul style="list-style-type: none"> <li>Hand hygiene is performed correctly <ul style="list-style-type: none"> <li>Hand wash</li> <li>Alcohol based hand rub</li> </ul> </li> <li></li> </ul> |           |           |           |           |           |
| Pre- insertion tasks are performed properly to prevent infection. | <ul style="list-style-type: none"> <li>Opens catheterization package, keeping bottom of pack sterile</li> </ul>                                                                              |           |           |           |           |           |
|                                                                   | <ul style="list-style-type: none"> <li>Puts on sterile gloves</li> </ul>                                                                                                                     |           |           |           |           |           |
|                                                                   | <ul style="list-style-type: none"> <li>Organizes supplies on sterile field</li> </ul>                                                                                                        |           |           |           |           |           |
|                                                                   | <ul style="list-style-type: none"> <li>Applies lubricant along sides of catheter tip</li> </ul>                                                                                              |           |           |           |           |           |



|                                                                     |                                                                                                                                                                                                                                                                                                               |  |  |  |  |  |
|---------------------------------------------------------------------|---------------------------------------------------------------------------------------------------------------------------------------------------------------------------------------------------------------------------------------------------------------------------------------------------------------|--|--|--|--|--|
| The provider performs the antisepsis before inserting the catheter. | <ul style="list-style-type: none"> <li>• Cleans urethral meatus with a non-alcoholic antiseptic solution: <ul style="list-style-type: none"> <li>○ If female: 5 swab technique</li> <li>○ male: retracts and cleans the foreskin (if uncircumcised), cleans glans and urethral opening</li> </ul> </li> </ul> |  |  |  |  |  |
| Insertion                                                           | • Uses “non-touch” technique                                                                                                                                                                                                                                                                                  |  |  |  |  |  |
|                                                                     | • Allows bladder to empty                                                                                                                                                                                                                                                                                     |  |  |  |  |  |
|                                                                     | • Inflates balloon                                                                                                                                                                                                                                                                                            |  |  |  |  |  |
|                                                                     | • Attaches end of catheter to a close collection system                                                                                                                                                                                                                                                       |  |  |  |  |  |
|                                                                     | • Secures the catheter to the thigh                                                                                                                                                                                                                                                                           |  |  |  |  |  |
|                                                                     | • Ensures that there is no obstruction or kinks in tubing                                                                                                                                                                                                                                                     |  |  |  |  |  |
|                                                                     | • Ensures that the urinary bag is below the level of bladder                                                                                                                                                                                                                                                  |  |  |  |  |  |
|                                                                     | • Checks that the urinary bag is above the floor                                                                                                                                                                                                                                                              |  |  |  |  |  |
| Healthcare waste and instrument management                          | • Disposes of healthcare waste in a colour coded/labelled container                                                                                                                                                                                                                                           |  |  |  |  |  |
|                                                                     | • Puts reusable dirty instruments in soapy water                                                                                                                                                                                                                                                              |  |  |  |  |  |
|                                                                     | • Removes gloves and disposes in a leak proof container                                                                                                                                                                                                                                                       |  |  |  |  |  |
| Hand hygiene                                                        | • Washes hands with soap and water                                                                                                                                                                                                                                                                            |  |  |  |  |  |
|                                                                     | • Allows hands to dry                                                                                                                                                                                                                                                                                         |  |  |  |  |  |
|                                                                     | • Documents the indication, date and time                                                                                                                                                                                                                                                                     |  |  |  |  |  |

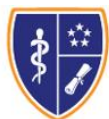

| Wound management (during ward round and wound dressing) |                                                                                                                                        |           |           |           |           |           |
|---------------------------------------------------------|----------------------------------------------------------------------------------------------------------------------------------------|-----------|-----------|-----------|-----------|-----------|
| Observed criteria                                       | <ul style="list-style-type: none"> <li>Verification</li> </ul>                                                                         | Patient 1 | Patient 2 | Patient 3 | Patient 4 | Patient 5 |
| Preparation                                             | <ul style="list-style-type: none"> <li>Prepares necessary supplies</li> </ul>                                                          |           |           |           |           |           |
|                                                         | <ul style="list-style-type: none"> <li>Explains the procedure to the patient</li> </ul>                                                |           |           |           |           |           |
|                                                         | <ul style="list-style-type: none"> <li>Wears appropriate PPE</li> </ul>                                                                |           |           |           |           |           |
|                                                         | <ul style="list-style-type: none"> <li>Protects the area surrounding the patient's wound with a plastic sheet</li> </ul>               |           |           |           |           |           |
| Hand hygiene before wound dressing.                     | <ul style="list-style-type: none"> <li>Hand hygiene is performed before the procedure:</li> <li>Wash hand</li> <li>ABHR</li> </ul>     |           |           |           |           |           |
| Removal of old wound dressing                           | <ul style="list-style-type: none"> <li>Puts on clean examination gloves</li> </ul>                                                     |           |           |           |           |           |
|                                                         | <ul style="list-style-type: none"> <li>Removes old wound dressing and disposes correctly</li> </ul>                                    |           |           |           |           |           |
|                                                         | <ul style="list-style-type: none"> <li>Pours sterile normal saline if dressing is adherent</li> </ul>                                  |           |           |           |           |           |
|                                                         | <ul style="list-style-type: none"> <li>Removes gloves and disposes correctly</li> </ul>                                                |           |           |           |           |           |
|                                                         | <ul style="list-style-type: none"> <li>Washes hands</li> </ul>                                                                         |           |           |           |           |           |
| New wound dressing                                      | <ul style="list-style-type: none"> <li>Puts on sterile gloves</li> </ul>                                                               |           |           |           |           |           |
|                                                         | <ul style="list-style-type: none"> <li>Uses sterile forceps, cotton balls or gauze to clean the wound (non-touch technique)</li> </ul> |           |           |           |           |           |
|                                                         | <ul style="list-style-type: none"> <li>Applies prescribed dressing solutions or medicines</li> </ul>                                   |           |           |           |           |           |
|                                                         | <ul style="list-style-type: none"> <li>Applies sterile dressing, one layer at a time</li> </ul>                                        |           |           |           |           |           |
|                                                         | <ul style="list-style-type: none"> <li>Secures the dressing</li> </ul>                                                                 |           |           |           |           |           |
| Healthcare waste and instruments management             | <ul style="list-style-type: none"> <li>Disposes of healthcare waste in a colour coded/labelled correctly</li> </ul>                    |           |           |           |           |           |
|                                                         | <ul style="list-style-type: none"> <li>Places instruments in soapy water</li> </ul>                                                    |           |           |           |           |           |
|                                                         | <ul style="list-style-type: none"> <li>Removes gloves and disposes them correctly</li> </ul>                                           |           |           |           |           |           |
| Hand hygiene after wound dressing                       | <ul style="list-style-type: none"> <li>Washes hands with soap and water</li> </ul>                                                     |           |           |           |           |           |
| Preoperatively                                          |                                                                                                                                        |           |           |           |           |           |

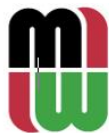

MALAWI LIVERPOOL  
WELLCOME PROGRAMME

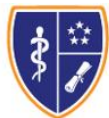

KAMUZU  
UNIVERSITY  
OF HEALTH SCIENCES

|                                  |                                                                                                        |  |  |  |  |  |
|----------------------------------|--------------------------------------------------------------------------------------------------------|--|--|--|--|--|
| No shaving of the operation site | <ul style="list-style-type: none"><li>• Checks patient file if patient was told not to shave</li></ul> |  |  |  |  |  |
|                                  | <ul style="list-style-type: none"><li>• If prophylaxis antibiotic was administered timely</li></ul>    |  |  |  |  |  |
